# Supplementary material for: Short implants (≤6 mm) versus longer implants with sinus floor elevation in atrophic posterior maxilla: a systematic review and meta-analysis
Source: PubMed Central journal article supplement — BMJ Open. 2019 Oct 28;9(10):e029826. doi: 10.1136/bmjopen-2019-029826 (PMC6830603; doi:10.1136/bmjopen-2019-029826), 2019-10-28
Supplement: bmjopen-2019-029826supp001.pdf [file bmjopen-2019-029826supp001.pdf]

---

*Supplementary File*

---

**Short implants ( $\leq 6$  mm) versus longer implants with sinus floor elevation in atrophic posterior maxilla: A systematic review and meta-analysis****The search strategy used for PubMed (1946 to 31 May 2018):**

1. dental implant [Mesh Terms]
2. dental implantation [Mesh Terms]
3. dental prosthesis, implant supported [Mesh Terms]
4. 1 OR 2 OR 3
5. long implant [Title/Abstract]
6. short implant [Title/Abstract]
7. shorter implant [Title/Abstract]
8. longer implant [Title/Abstract]
9. super short [Title/Abstract]
10. extra short [Title/Abstract]
11. ultrashort [Title/Abstract]
12. 6mm [Title/Abstract]
13. 5mm [Title/Abstract]
14. 4mm [Title/Abstract]
15. 5 OR 6 OR 7 OR 8 OR 9 OR 10 OR 11 OR 12 OR 13 OR 14
16. 4 OR 15
17. alveolar bone loss [Mesh Terms]
18. alveolar bone atrophy [Mesh Terms]
19. alveolar ridge augmentation [Mesh Terms]
20. bone substitute [Mesh Terms]
21. augmentation, sinus floor [Mesh Terms]
22. 17 OR 18 OR 19 OR 20 OR 21
23. atrophy jaw [Title/Abstract]
24. atrophy maxilla [Title/Abstract]
25. atrophy mandible [Title/Abstract]
26. augmented bone [Title/Abstract]

---

*Supplementary File*

---

27. bone augmentation [Title/Abstract]
28. sinus lift [Title/Abstract]
29. sinus floor elevation [Title/Abstract]
30. 23 OR 24 OR 25 OR 26 OR 27 OR 28 OR 29
31. 22 OR 30
32. randomized controlled trial [Publication Type]
33. randomized [Title/Abstract]
34. randomly [Title/Abstract]
35. 32 OR 33 OR 34
36. 16 AND 31 AND 35

**The search strategy used for Embase (1980 to 31 May 2018):**

1. 'alveolar bone loss'/exp/mj
2. 'alveolar ridge augmentation'/exp/mj
3. 'bone prosthesis'/exp/mj
4. 1 OR 2 OR 3
5. 'atrophic jaw': ab, ti
6. 'atrophic maxilla': ab, ti
7. 'atrophic mandible': ab, ti
8. 'posterior maxilla': ab, ti
9. 'posterior mandible': ab, ti
10. 'augmented bone': ab, ti
11. 'bone augmentation': ab, ti
12. 'sinus lift': ab, ti
13. 'sinus floor elevation': ab, ti
14. 5 OR 6 OR 7 OR 8 OR 9 OR 10 OR 11 OR 12 OR 13
15. 4 OR 14
16. 'tooth implantation'/exp/mj
17. 'tooth implant'/exp/mj
18. 'tooth prosthesis'/exp/mj
19. 16 OR 17 OR 18
20. 'short implant': ab, ti

---

*Supplementary File*

---

21. 'long implant': ab, ti
22. 'shorter implant': ab, ti
23. 'longer implant': ab, ti
24. 'super short': ab, ti
25. 'extra short': ab, ti
26. 'ultrashort': ab, ti
27. '6mm': ab, ti
28. '5mm': ab, ti
29. '4mm': ab, ti
30. 20 OR 21 OR 22 OR 23 OR 24 OR 25 OR 26 OR 27 OR 28 OR 29
31. 19 OR 30
32. 'controlled clinical trial'/lim
33. 'randomized controlled trial'/lim
34. 32 OR 33
35. 15 AND 31 AND 34
